# Supplementary material
Source: MDPI journal article supplement (https://www.mdpi.com/2227-9040/10/3/98)
Supplement: s1 [file s1]

**Supporting information for:**

## **Cucurbit[8]uril-based potentiometric sensor coupled to HPLC for determination of tetracycline residues in milk samples**

Renato L. Gil<sup>1</sup>, Célia G. Amorim<sup>\*1</sup>, Maria C.B.S.M. Montenegro<sup>1</sup> and Alberto N. Araújo<sup>1</sup>

<sup>1</sup>LAQV-REQUIMTE, Department of Chemical Sciences, Faculty of Pharmacy, University of Porto, Jorge Viterbo Ferreira, 228, 4050-313, Porto, Portugal.

CORRESPONDING AUTHOR (\*): C. Amorim ([camorim@ff.up.pt](mailto:camorim@ff.up.pt))

**KEYWORDS:** *tetracycline antibiotics; milk, HPLC; potentiometry; ion-selective electrodes; cucurbit[8]uril.*

## Experimental section

**Potentiometric measurements.** All experiments were carried out at room temperature of  $22\pm 1^\circ\text{C}$ . To calibrate each tetracycline-selective electrode, the dynamic potentiometric response was obtained at increasing concentrations of tetracycline antibiotics solution and then, the corresponding logarithmic concentrations ( $c_{TC}$ ) were plotted versus the steady-state EMF value (ionic strength adjusted with 0.05 M of oxalic acid solution). The data was fitted to the Nernst equation to obtain the sensitivity (slope) and intercept [49]. The limit of detection (LOD) of the potentiometric electrodes was calculated as the concentration related to the cross point between the extrapolation of the lines defining the nonresponsive range and linear-response range of the electrode [49]. The response time was determined as the time that elapses between the instant at which the concentration of the target TC is changed in the solution and the first instant at which the measured EMF of the electrochemical cell becomes equal to 95% of the signal at a steady-state [49].

## Tables

**Table S1.** Linear fittings (EMF response in mV *versus* logarithmic concentration) for the tetracycline-selective electrode (ISM B) in batch and flow conditions.

| Calibration parameter                         |              | OTC                                            | TTC                                            | CTC                                            | DXC                                            |
|-----------------------------------------------|--------------|------------------------------------------------|------------------------------------------------|------------------------------------------------|------------------------------------------------|
| <b>Slope<sup>a</sup>, mV dec<sup>-1</sup></b> |              |                                                |                                                |                                                |                                                |
|                                               | <b>Batch</b> | 56.2±0.9                                       | 53.8±2.2                                       | 63.4±2.1                                       | 59.0±0.1                                       |
|                                               | <b>Flow</b>  | 11.2±0.3                                       | 24.9±5.8                                       | 34.7±6.2                                       | 21.0±7.0                                       |
| <b>LRR, M</b>                                 |              |                                                |                                                |                                                |                                                |
|                                               | <b>Batch</b> | 6.0x10 <sup>-6</sup> –<br>1.0x10 <sup>-3</sup> | 1.0x10 <sup>-6</sup> –<br>1.0x10 <sup>-3</sup> | 3.0x10 <sup>-7</sup> –<br>1.0x10 <sup>-3</sup> | 3.0x10 <sup>-7</sup> –<br>1.0x10 <sup>-3</sup> |
|                                               | <b>Flow</b>  | 1.0x10 <sup>-5</sup> –<br>1.0x10 <sup>-4</sup> |
| <b>LOD<sup>a,b</sup>, M</b>                   |              |                                                |                                                |                                                |                                                |
|                                               | <b>Batch</b> | (2.5±0.0)x10 <sup>-6</sup>                     | (4.3±0.5)x10 <sup>-7</sup>                     | (1.5±1.3)x10 <sup>-7</sup>                     | (1.8±0.7)x10 <sup>-7</sup>                     |
|                                               | <b>Flow</b>  | (7.5±0.2)x10 <sup>-6</sup>                     | (5.2±0.2)x10 <sup>-6</sup>                     | (8.2±0.1)x10 <sup>-6</sup>                     | (7.1±1.5)x10 <sup>-6</sup>                     |

<sup>a</sup> Standard deviation value was calculated from three subsequent calibrations of the same electrode

<sup>b</sup> Based on conventional definition used in potentiometry [5]

LRR: Linear response range; LOD: Limit of detection.

**Table S2.** Limits of detection (calculated by IUPAC recommendation [49]) of the miniaturized TC-selective electrodes prepared with different amount of MWCNTs.

| Calibration parameter             | ISM      | MWCNTs (wt%) | OTC                  | TTC                  | CTC                  | DXC                  |
|-----------------------------------|----------|--------------|----------------------|----------------------|----------------------|----------------------|
| <b>LOD (IUPAC)<sup>c</sup>, M</b> |          |              |                      |                      |                      |                      |
|                                   | <b>B</b> | 0.0          | 7.5x10 <sup>-6</sup> | 5.2x10 <sup>-6</sup> | 8.2x10 <sup>-6</sup> | 7.1x10 <sup>-6</sup> |
|                                   | <b>C</b> | 1.0          | 5.5x10 <sup>-6</sup> | 1.9x10 <sup>-6</sup> | 7.5x10 <sup>-6</sup> | 7.9x10 <sup>-6</sup> |
|                                   | <b>D</b> | 2.0          | 5.2x10 <sup>-6</sup> | 3.4x10 <sup>-6</sup> | 7.9x10 <sup>-6</sup> | 7.7x10 <sup>-6</sup> |

**Table S3.** Chromatographic parameters of the target tetracycline antibiotics using the proposed HPLC-potentiometric method.

| Analyte           | $t_R$ | $N_{eff}$ | $k$  | $\alpha$ | $R_s$ | $T_f$ |
|-------------------|-------|-----------|------|----------|-------|-------|
| Oxytetracycline   | 9.3   | 5900      | 8.0  |          |       | 1.4   |
|                   |       |           |      | 1.4      | 6.3   |       |
| Tetracycline      | 12.9  | 6121      | 11.5 |          |       | 1.6   |
|                   |       |           |      | 1.6      | 13.8  |       |
| Chlortetracycline | 21.2  | 48926     | 18.3 |          |       | 1.5   |
|                   |       |           |      | 1.2      | 8.2   |       |
| Doxycycline       | 24.7  | 44519     | 21.4 |          |       | 1.4   |

$t_R$ , retention time, in minutes;  $N_{eff}$ , effective plate number;  $k$ , retention factor;  $\alpha$ , separation factor, between every two successive peaks;  $R_s$ , peak resolution, between every two successive peaks;  $T_f$ , tailing factor.

**Table S4.** Chromatographic parameters of the target tetracycline antibiotics using the HPLC-UV method.

| Analyte           | $t_R$ | $N_{eff}$ | $k$  | $\alpha$ | $R_s$ | $T_f$ |
|-------------------|-------|-----------|------|----------|-------|-------|
| Oxytetracycline   | 9.3   | 8221      | 8.0  |          |       | 1.2   |
|                   |       |           |      | 1.4      | 7.4   |       |
| Tetracycline      | 12.9  | 8233      | 11.5 |          |       | 1.1   |
|                   |       |           |      | 1.6      | 16.0  |       |
| Chlortetracycline | 21.2  | 67084     | 18.3 |          |       | 1.1   |
|                   |       |           |      | 1.2      | 9.0   |       |
| Doxycycline       | 24.7  | 47146     | 21.4 |          |       | 1.1   |

$t_R$ , retention time, in minutes;  $N_{eff}$ , effective plate number;  $k$ , retention factor;  $\alpha$ , separation factor, between every two successive peaks;  $R_s$ , peak resolution, between every two successive peaks;  $T_f$ , tailing factor.

**Table S5.** Analytical figures of merit obtained with the proposed HPLC method using the UV detector (355 nm).

| Validation parameters                           | OTC                                         | TTC                                         | CTC                                         | DXC                                         |
|-------------------------------------------------|---------------------------------------------|---------------------------------------------|---------------------------------------------|---------------------------------------------|
| <b>Calibration curve</b>                        | Peak area (U.A. x s) vs [TC] $\mu\text{M}$  |                                             |                                             |                                             |
| <b>Linear range, M</b>                          | $1.0 \times 10^{-8}$ – $1.0 \times 10^{-5}$ | $1.0 \times 10^{-8}$ – $1.0 \times 10^{-5}$ | $1.0 \times 10^{-7}$ – $1.0 \times 10^{-8}$ | $1.0 \times 10^{-7}$ – $1.0 \times 10^{-8}$ |
| <b>R<sup>2</sup></b>                            | 0.9995 $\pm$ 0.0002                         | 0.9994 $\pm$ 0.0001                         | 0.9992 $\pm$ 0.0007                         | 0.9977 $\pm$ 0.0031                         |
| <b>Slope</b>                                    | 0.067 $\pm$ 0.007                           | 0.081 $\pm$ 0.009                           | 0.034 $\pm$ 0.004                           | 0.047 $\pm$ 0.008                           |
| <b>Intercept</b>                                | 0.001 $\pm$ 0.006                           | 0.001 $\pm$ 0.008                           | 0.000 $\pm$ 0.003                           | -0.004 $\pm$ 0.004                          |
| <b>LOD, M (<math>\mu\text{g L}^{-1}</math>)</b> | $3.0 \times 10^{-9}$ (1.4)                  | $3.0 \times 10^{-9}$ (1.3)                  | $3.0 \times 10^{-9}$ (1.4)                  | $3.0 \times 10^{-9}$ (1.3)                  |
| <b>LOQ, M (<math>\mu\text{g L}^{-1}</math>)</b> | $1.0 \times 10^{-8}$ (4.6)                  | $1.0 \times 10^{-8}$ (4.4)                  | $1.0 \times 10^{-8}$ (4.8)                  | $1.0 \times 10^{-8}$ (4.4)                  |
| <b>Precision (RSD%)</b>                         |                                             |                                             |                                             |                                             |
|                                                 | <b>Intra-day</b>                            |                                             |                                             |                                             |
| <b><math>3.0 \times 10^{-7}</math> M</b>        | 4.4                                         | 5.4                                         | 3.8                                         | 8.2                                         |
| <b><math>1.0 \times 10^{-6}</math> M</b>        | 3.7                                         | 3.8                                         | 4.2                                         | 4.0                                         |
| <b><math>1.0 \times 10^{-5}</math> M</b>        | 2.9                                         | 3.3                                         | 3.8                                         | 4.2                                         |
|                                                 | <b>Inter-day</b>                            |                                             |                                             |                                             |
| <b><math>3.0 \times 10^{-7}</math> M</b>        | 6.1                                         | 11.5                                        | 10.8                                        | 9.4                                         |
| <b><math>1.0 \times 10^{-6}</math> M</b>        | 7.5                                         | 5.3                                         | 19.1                                        | 14.3                                        |
| <b><math>1.0 \times 10^{-5}</math> M</b>        | 4.0                                         | 2.6                                         | 1.2                                         | 11.4                                        |

**Table S6.** Results obtained for determination of tetracycline antibiotics in spiked milk samples by HPLC using the proposed potentiometric detector compared with the UV detector ( $n=3$  for each concentration).

|          |                            | Samples          |                 |                      |                       |                 |                      |                         |                  |                      |
|----------|----------------------------|------------------|-----------------|----------------------|-----------------------|-----------------|----------------------|-------------------------|------------------|----------------------|
| Analytes | Added $\mu\text{g L}^{-1}$ | UHT skimmed milk |                 |                      | UHT semi-skimmed milk |                 |                      | Fresh semi-skimmed milk |                  |                      |
|          |                            | HPLC-POT         | HPLC-UV         | p-value <sup>a</sup> | HPLC-POT              | HPLC-UV         | p-value <sup>a</sup> | HPLC-POT                | HPLC-UV          | p-value <sup>a</sup> |
| OTC      | 50                         | <LOQ             | 46.7 $\pm$ 1.4  | –                    | <LOQ                  | 52.9 $\pm$ 2.8  | –                    | <LOQ                    | 49.0 $\pm$ 2.0   | –                    |
|          | 100                        | 100.1 $\pm$ 3.2  | 102.3 $\pm$ 3.6 | 0.478                | 103.3 $\pm$ 4.9       | 101.3 $\pm$ 3.5 | 0.607                | 98.0 $\pm$ 6.9          | 98.0 $\pm$ 1.0   | 0.990                |
|          | 200                        | 204.6 $\pm$ 10.7 | 193.8 $\pm$ 0.6 | 0.223                | 178.0 $\pm$ 6.2       | 179.9 $\pm$ 3.5 | 0.677                | 180.4 $\pm$ 15.0        | 177.1 $\pm$ 15.2 | 0.802                |
| TTC      | 50                         | 49.1 $\pm$ 4.2   | 48.4 $\pm$ 0.8  | 0.806                | 50.1 $\pm$ 1.4        | 48.2 $\pm$ 1.7  | 0.231                | 51.9 $\pm$ 1.6          | 49.4 $\pm$ 1.2   | 0.097                |
|          | 100                        | 91.0 $\pm$ 6.1   | 96.1 $\pm$ 2.4  | 0.247                | 87.7 $\pm$ 5.3        | 86.1 $\pm$ 3.6  | 0.678                | 84.1 $\pm$ 3.2          | 81.6 $\pm$ 0.7   | 0.258                |
|          | 200                        | 174.3 $\pm$ 16.8 | 163.3 $\pm$ 3.3 | 0.383                | 194.4 $\pm$ 8.6       | 197.4 $\pm$ 4.2 | 0.617                | 183.1 $\pm$ 13.9        | 183.6 $\pm$ 3.5  | 0.952                |
| CTC      | 50                         | 46.9 $\pm$ 3.0   | 41.3 $\pm$ 2.7  | 0.074                | 47.6 $\pm$ 1.2        | 48.3 $\pm$ 4.0  | 0.778                | 49.2 $\pm$ 3.0          | 52.4 $\pm$ 2.7   | 0.144                |
|          | 100                        | 88.5 $\pm$ 7.9   | 96.3 $\pm$ 0.7  | 0.231                | 88.7 $\pm$ 2.0        | 85.7 $\pm$ 1.1  | 0.083                | 103.9 $\pm$ 4.5         | 101.8 $\pm$ 0.5  | 0.510                |
|          | 200                        | 197.0 $\pm$ 15.4 | 195.7 $\pm$ 2.4 | 0.901                | 192.4 $\pm$ 5.6       | 188.1 $\pm$ 3.6 | 0.331                | 185.4 $\pm$ 11.5        | 179.2 $\pm$ 2.3  | 0.456                |
| DXC      | 50                         | 45.9 $\pm$ 3.2   | 52.3 $\pm$ 3.8  | 0.087                | 48.5 $\pm$ 2.1        | 51.9 $\pm$ 2.0  | 0.111                | 44.1 $\pm$ 1.9          | 45.2 $\pm$ 1.6   | 0.503                |
|          | 100                        | 95.6 $\pm$ 2.0   | 97.0 $\pm$ 0.7  | 0.319                | 108.5 $\pm$ 2.1       | 111.5 $\pm$ 1.0 | 0.087                | 88.1 $\pm$ 3.1          | 85.4 $\pm$ 1.4   | 0.242                |
|          | 200                        | 190.1 $\pm$ 12.2 | 184.7 $\pm$ 4.6 | 0.513                | 162.7 $\pm$ 6.8       | 165.2 $\pm$ 4.4 | 0.624                | 177.4 $\pm$ 10.7        | 171.7 $\pm$ 2.4  | 0.459                |

N.D. Not detected.

<sup>a</sup> p-value calculated from the bilateral t-test with 95% confidence level.

**Table S7.** Comparison of the proposed method with other published methods for determination of tetracycline antibiotics in milk.

| Analytes                | Extraction method | Sample volume | Instrumental technique | Analysis time | LOD/LOQ                                  | PF          | Intra-day RSD% | Recovery % | Ref.      |
|-------------------------|-------------------|---------------|------------------------|---------------|------------------------------------------|-------------|----------------|------------|-----------|
| CTC, DXC, MTC, TTC      | IL-DLLME          | 5 mL          | HPLC-DAD               | 27 min        | 0.12-0.45/- $\mu\text{g L}^{-1}$         | 25-98       | 0.6-1.2        | 75.8-109.2 | [69]      |
| CTC, OTC, TTC           | MSPD              | 0.18 g        | HPLC-MS/MS             | 18 min        | 0.2-0.3/0.7-1.1 $\mu\text{g kg}^{-1}$    | N.G.        | 3.8-6.9        | 84.7-92.8  | [71]      |
| CTC, DMC, DXC, OTC, TTC | dSPE              | 3 g           | UHPLC-HRMS             | > 30 min      | -/25 $\mu\text{g kg}^{-1}$               | N.G.        | 9-19           | 101-109    | [12]      |
| CTC, DXC                | Prime HLB- SPE    | 1 g           | HPLC-MS/MS             | > 60 min      | 0.5-1.0/5.0-10.0 $\mu\text{g kg}^{-1}$   | N.G.        | 5.1-9.5        | 70.3-102.4 | [13]      |
| CTC, DXC, OTC, TTC      | RACNTs- SPE       | 0.5 mL        | HPLC-DAD               | 12 min        | 7.5-13.2/25.0-44.0 $\mu\text{g L}^{-1}$  | N.G.        | 3.9-17.6       | 47.0-59.0  | [72]      |
| CTC, DMC, OTC, TTC, TTC | Mag-SPE           | 10 mL         | HPLC-MS/MS             |               | 8.1-83.2/17.4-182.7 $\text{ng L}^{-1}$   | 50          | 1.1-5.4        | 87.0-101.8 | [11]      |
|                         | Mag-SPE           | 5 mL          | HPLC-DAD               | > 30 min      | 3.5/9.8 $\mu\text{g L}^{-1}$             | 100         | 3.8            | 94.6-105.4 | [65]      |
| CTC, DXC, OTC, TTC      | Mag-SPE           | 1 mL          | HPLC-DAD               | > 45 min      | 40/50 $\mu\text{g L}^{-1}$               | 4           | 1.1-2.2        | 87.8-107.5 | [66]      |
| DXC, OTC, TTC           | Mag-SPE- DLLME    | 1 mL          | HPLC-UV                | > 60 min      | 1.8-2.9/6.1-9.8 $\mu\text{g L}^{-1}$     | 66.7        | 0.1-6.9        | 70.6-121.5 | [70]      |
| DXC, CTC, OTC, TTC      | HLB- SPE          | 5 g           | HPLC-MS/MS             | > 60 min      | 1-10/50 $\mu\text{g kg}^{-1}$            | 10          | 1.8-8.3        | 74.4-101   | [67]      |
| CTC, OTC, TTC           | HLB-SPE           | 5 mL          | HPLC-DAD               | > 60 min      | 20/60 $\mu\text{g L}^{-1}$               | 10          | 2.7-4.9        | 83-112     | [68]      |
| CTC, DXC, OTC, TTC      | Prime HLB- SPE    | 1 mL          | HPLC-POT               | > 60 min      | 13.3-46.0/44.4-92.1 $\mu\text{g L}^{-1}$ | Not applied | 0.5-11.2       | 81.3-108.5 | This work |

CTC – chlortetracycline; DAD – diode-array detector; DLLME – dispersive liquid liquid microextraction; DMC – demeclocycline; dSPE – dispersive solid phase extraction; DXC – doxycycline; HRMS – high resolution mass spectrometry; IL – ionic liquid; MSPD – matrix solid phase dispersion; MagSPE – Magnetic solid phase extraction; MS/MS – tandem mass spectrometric detector; MSPD – matrix solid phase dispersion; MTC – methacycline; N.G. not given; OTC – oxytetracycline; PF – pre-concentration; POT – potentiometric detector; RACNTs – restricted accesses carbon nanotubes; SPE – solid phase extraction; TTC – tetracycline; UV – ultraviolet detector.

## Figures

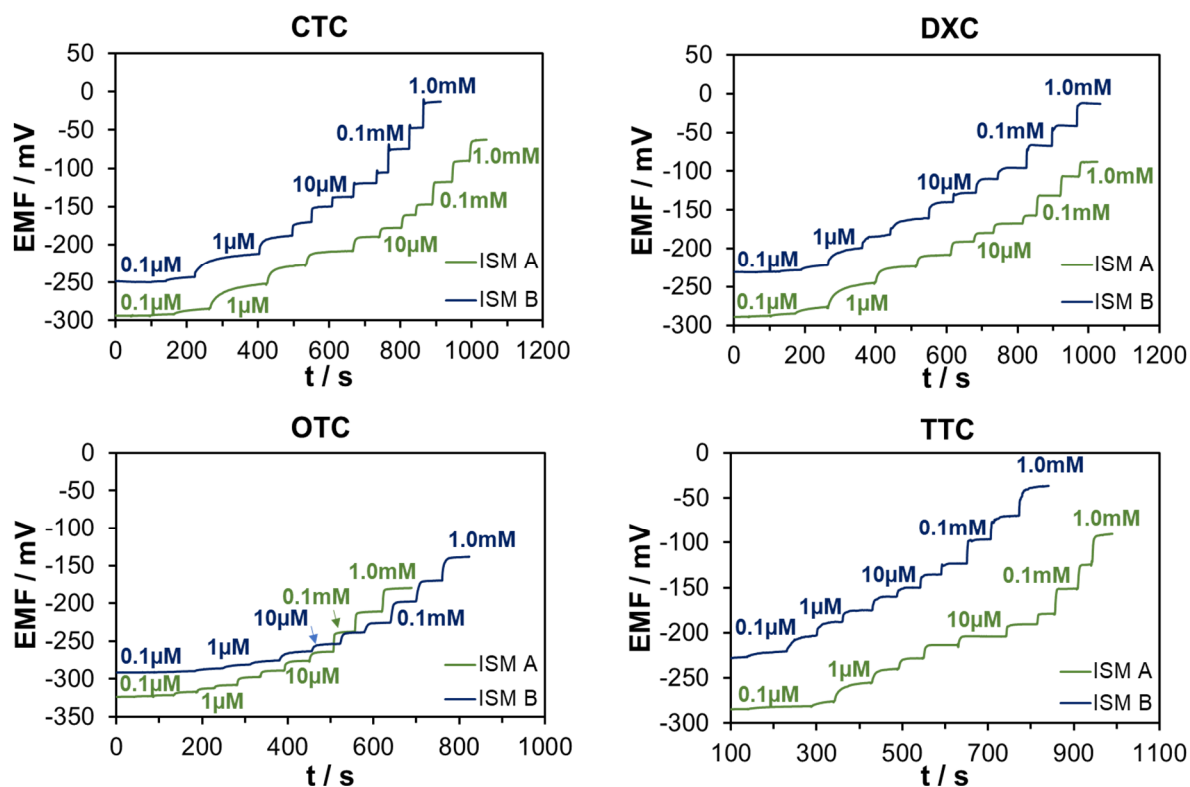

**Figure S1.** Dynamic potentiometric responses for ion-selective electrodes prepared without (ISM A) and with CB[8] (ISM B) in batch conditions at the increasing concentration of chlortetracycline (CTC), doxycycline (DXC), oxytetracycline (OTC), and tetracycline (TTC).



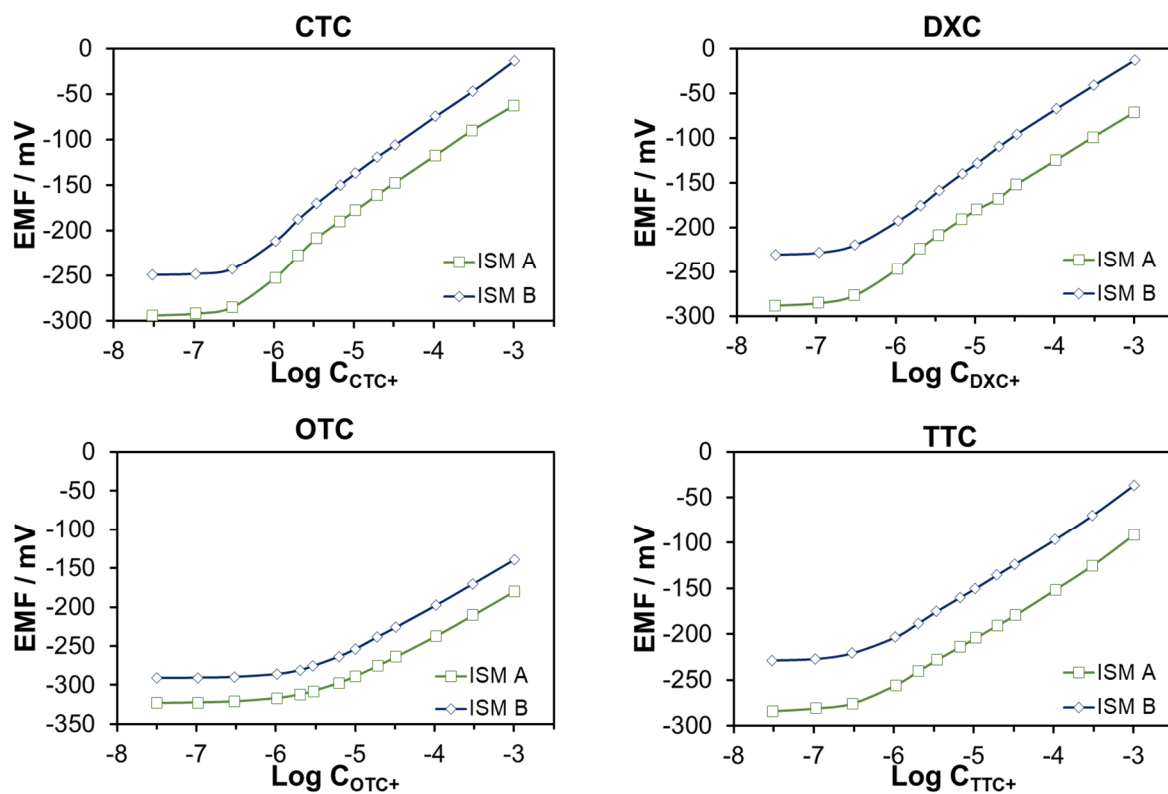

**Figure S2.** Calibration curves of EMF responses of CTC, DXC, OTC, and TTC obtained with the ion-selective electrodes prepared without (ISM A) and with CB[8] (ISM B) in batch conditions.

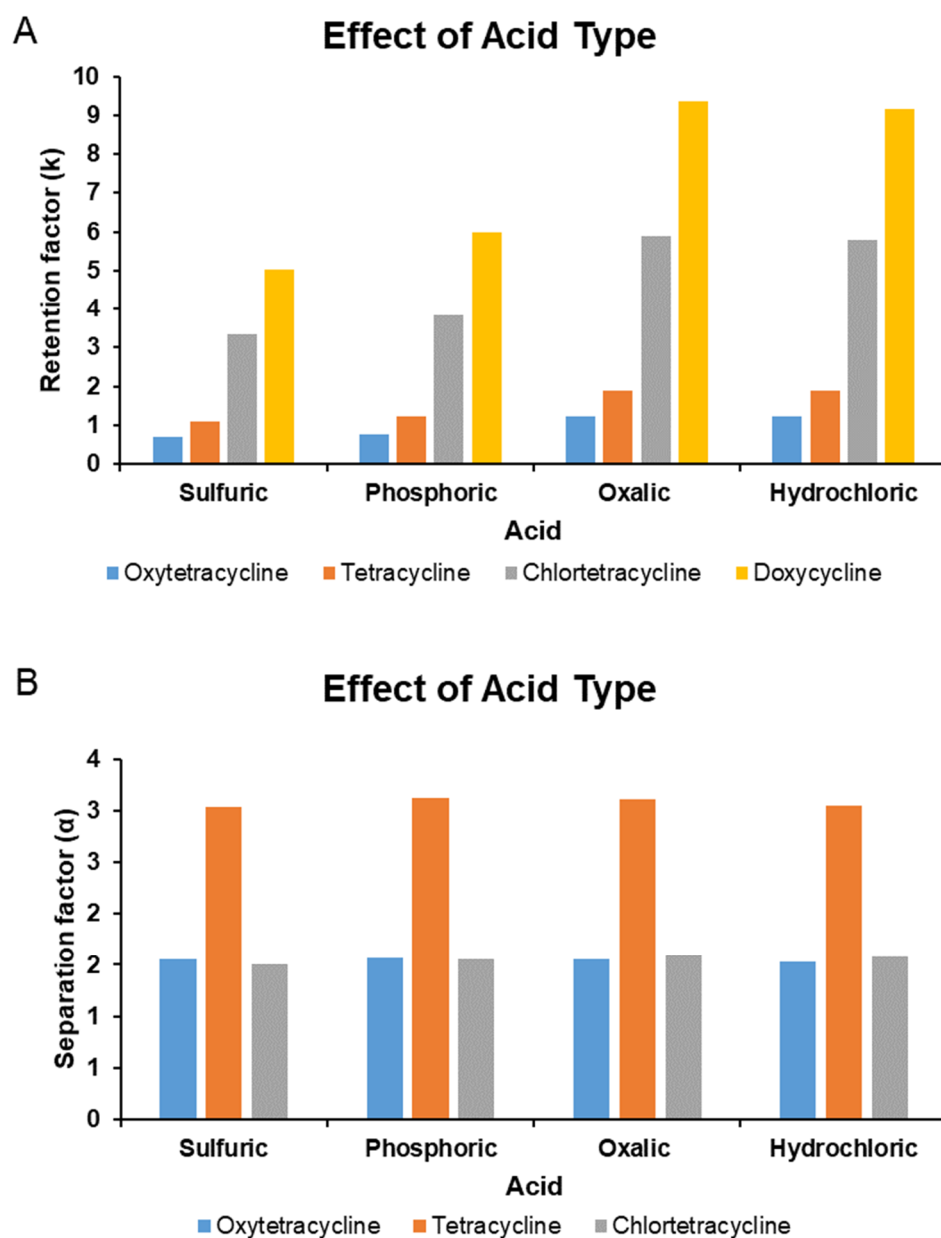

**Figure S3.** Effect of the acidifying agent of the mobile phase in the (A) retention and (B) separation factors.

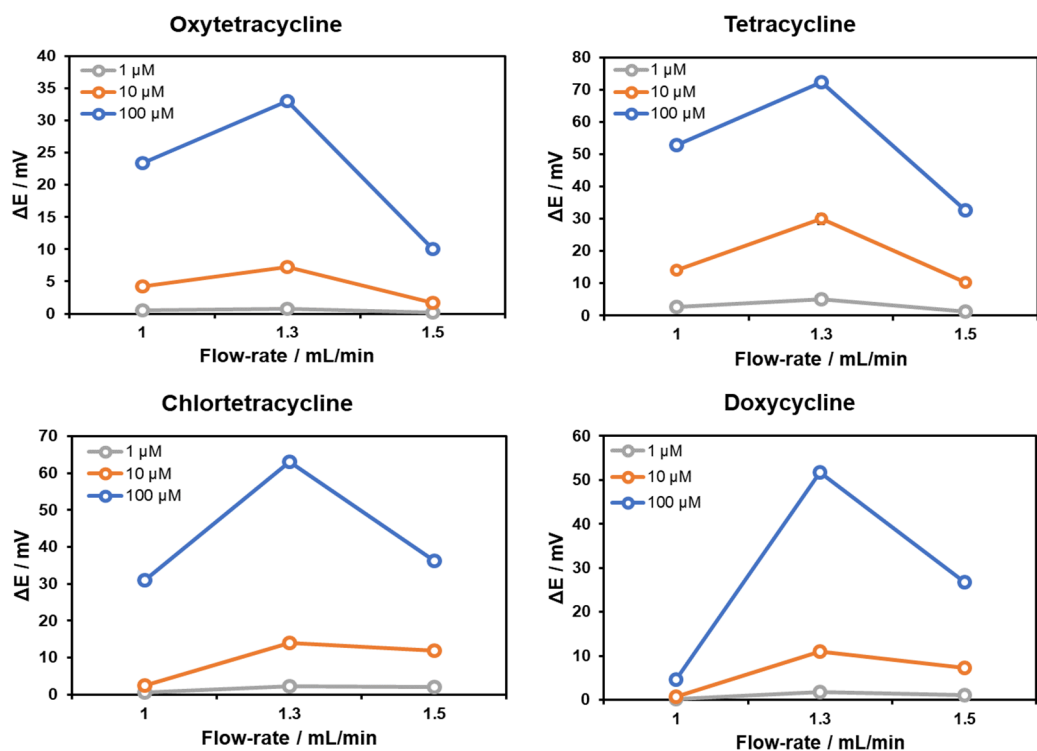

**Figure S4.** Detector performance (peak heights in mV) for standard solutions of four tetracycline antibiotics at 1.0, 10.0, and 100.0 μM as a function of the mobile phase flow rate.

Gradient elution: solvent A – 0.005 M H<sub>2</sub>SO<sub>4</sub>:ACN (90:10, v/v) and solvent B – 0.005 M H<sub>2</sub>SO<sub>4</sub>:ACN (80:20, v/v); Column: Luna 5 μm C8(2), 150 x 4.6 mm I.D. (Phenomenex); Injection volume: 100 μL.

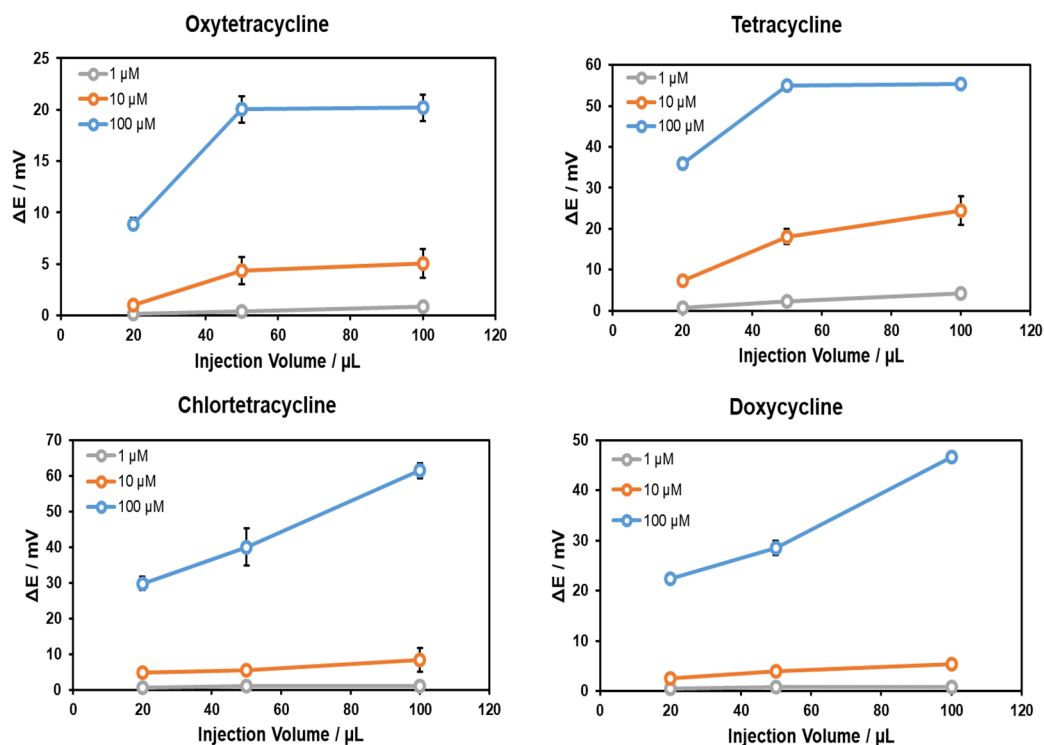

**Figure S5.** Detector performance (peak heights in mV) for standard solutions of four tetracycline antibiotics at 1.0, 10.0, and 100.0  $\mu\text{M}$  as a function of the injection volume. Gradient elution: solvent A – 0.005 M  $\text{H}_2\text{SO}_4$ :ACN (90:10, v/v) and solvent B – 0.005 M  $\text{H}_2\text{SO}_4$ :ACN (80:20, v/v); Column: Luna 5  $\mu\text{m}$  C8(2), 150 x 4.6 mm I.D. (Phenomenex); Flow rate: 1.3 mL  $\text{min}^{-1}$ .

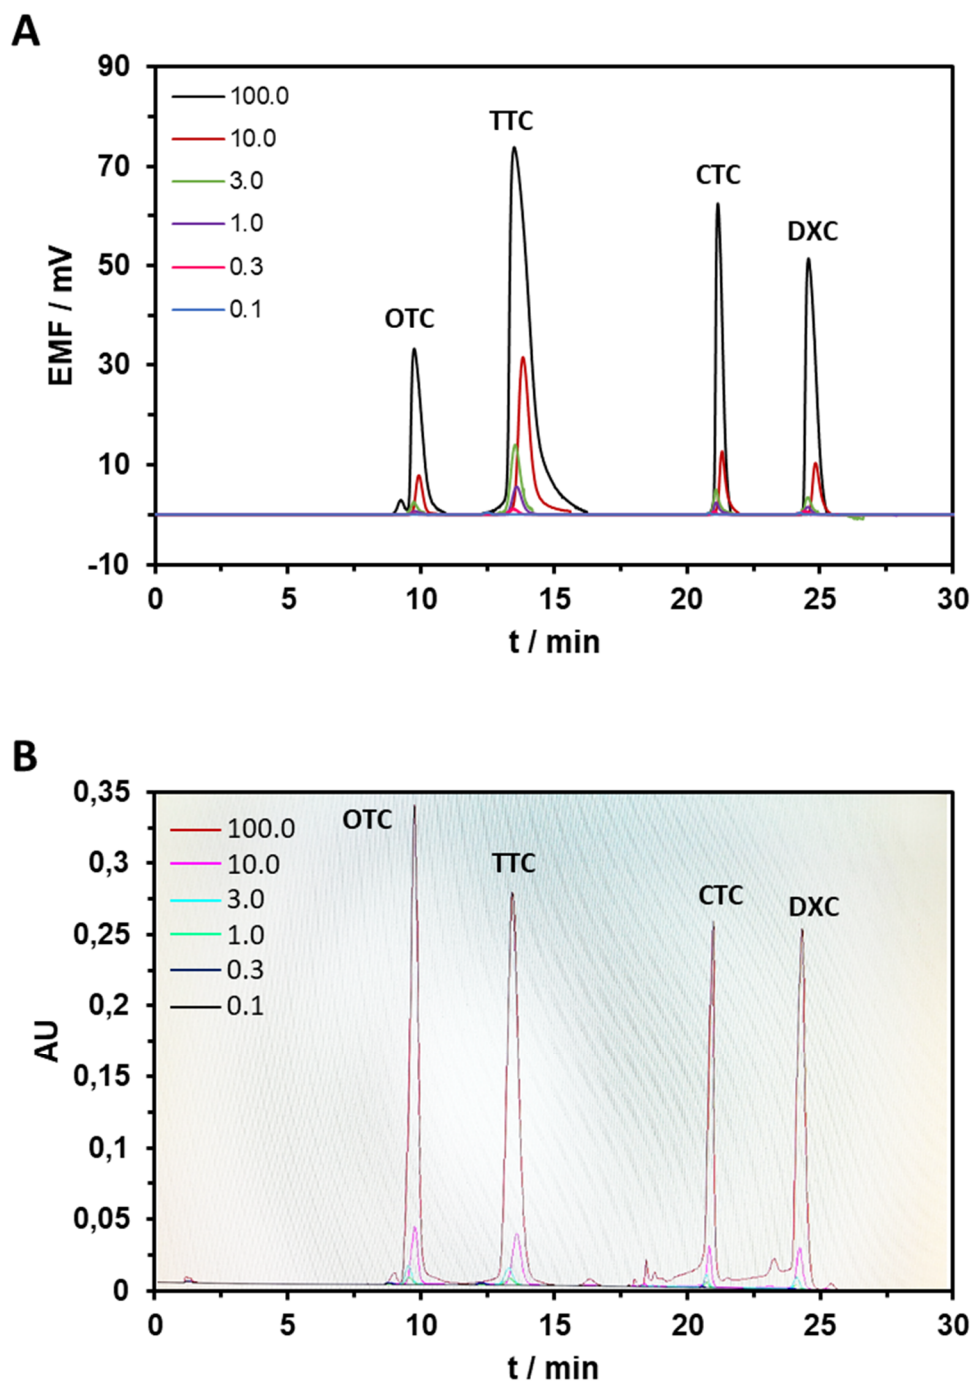

**Figure S6.** Chromatograms at increasing concentrations (0.1, 0.3, 1.0, 3.0, 10.0, 100.0  $\mu\text{M}$ ) of tetracycline antibiotics obtained with the proposed tetracycline potentiometric detector (A) and the UV detector (wavelength 355 nm) in HPLC.

Gradient elution: solvent A – 0.005 M  $\text{H}_2\text{SO}_4$ :ACN (90:10, v/v) and solvent B – 0.005 M  $\text{H}_2\text{SO}_4$ :ACN (80:20, v/v); Column: Luna 5  $\mu\text{m}$  C8(2), 150 x 4.6 mm I.D. (Phenomenex); Flow rate: 1.3 mL  $\text{min}^{-1}$ .

Chlortetracycline (CTC), doxycycline (DXC), oxytetracycline (OTC), and tetracycline (TTC).
